# Supplementary material for: Effects of a 12-Month Hybrid (In-Person + Virtual) Education Program in the Glycemic Status of Arab Youth
Source: MDPI journal article supplement (doi:10.3390/nu14091759), 2022-04-22
Supplement: s1 [file s1]

**Supplementary Table S1:** Percentage (%) change in Diabetes and Physical Activity (PA) status.

| Parameters            | Baseline DM Status |     | Post-Intervention |           |          | P-Value |
|-----------------------|--------------------|-----|-------------------|-----------|----------|---------|
|                       |                    |     | Normal            | Pre-DM    | DM       |         |
| DM                    | 20 (3.1)           |     | 11 (55.0)         | 5 (25.0)  | 4 (20.0) | <0.001  |
| Pre-DM                | 39 (6.1)           |     | 34 (87.2)         | 2 (5.1)   | 3 (7.7)  |         |
| Normal                | 584 (90.8)         |     | 475 (81.3)        | 60 (10.3) | 49 (8.4) |         |
| Physical Activity (N) |                    |     |                   |           |          |         |
| DM                    | High PA            | 5   | 4 (80.0)          | 1 (20.0)  | 0        | 0.55    |
|                       | Moderated PA       | 9   | 4 (44.4)          | 3 (33.3)  | 2 (22.2) |         |
|                       | Low PA             | 6   | 2 (33.3)          | 2 (33.3)  | 2 (33.3) |         |
| Pre-DM                | High PA            | 6   | 6 (100)           | 0         | 0        | 0.20    |
|                       | Moderated PA       | 14  | 14 (100)          | 0         | 0        |         |
|                       | Low PA             | 19  | 14 (73.7)         | 2 (10.5)  | 3 (15.8) |         |
| Normal                | High PA            | 46  | 39 (84.8)         | 5 (10.9)  | 2 (4.3)  | 0.57    |
|                       | Moderated PA       | 200 | 165 (82.5)        | 22 (11.0) | 13 (6.5) |         |
|                       | Low PA             | 327 | 264 (80.7)        | 31 (9.5)  | 32 (9.8) |         |

**Note:** Data presented as N (%). PA, physical activity; P-value significant at 0.05 using McNemar test.

**Supplementary Table S2:** Cross-tabulation BMI and diabetes status at baseline and post-intervention.

| Diabetes Status | Baseline BMI | N (%)     | Post-intervention |            |           | P-Value |
|-----------------|--------------|-----------|-------------------|------------|-----------|---------|
|                 |              |           | Normal            | Overweight | Obese     |         |
| <b>DM</b>       | Normal       | 14 (70)   | 13 (92.9)         | 1 (7.1)    | 0         | 0.25    |
|                 | Overweight   | 4 (20)    | 4 (100.0)         | 0          | 0         |         |
|                 | Obese        | 2 (10)    | 0                 | 1 (50.0)   | 1 (50.0)  |         |
| <b>Pre-DM</b>   | Normal       | 15 (40.5) | 15 (100)          | 0          | 0         | 0.03    |
|                 | Overweight   | 9 (23.1)  | 6 (66.7)          | 3 (33.3)   | 0         |         |
|                 | Obese        | 13 (33.3) | 1 (7.7)           | 2 (15.4)   | 10 (76.9) |         |
| <b>Normal</b>   | Normal       | 362 (62)  | 344 (95)          | 18 (5.0)   | 0         | <0.001  |
|                 | Overweight   | 99 (17)   | 45 (45.5)         | 52 (52.5)  | 2 (2)     |         |
|                 | Obese        | 91 (15.6) | 2 (2.2)           | 35 (38.5)  | 54 (59.3) |         |

**Note:** Data presented N (%). P-value significant at 0.05 using Fisher exact test and McNemar test.
